# Supplementary material for: Signal contribution of distant areas to cosmic-ray neutron sensors – implications for footprint and sensitivity
Source: Copernicus journal article supplement (doi:10.5194/hess-27-723-2023), 2023-02-09
Supplement: Supplementary file 2 [file hess-27-723-2023-supplement.zip]

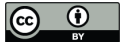

*Supplement of*

## **Signal contribution of distant areas to cosmic-ray neutron sensors – implications for footprint and sensitivity**

**Martin Schrön et al.**

*Correspondence to:* Martin Schrön ([martin.schroen@ufz.de](mailto:martin.schroen@ufz.de))

- [hess-27-723-2023-supplement-title-page.pdf](#)
- [S1-remote\\_wetting.zip](#)
- [S2-remote\\_drying.zip](#)
- [S3-uranos\\_input\\_files.zip](#)

The copyright of individual parts of the supplement might differ from the article licence.
