# Supplementary material for: Signal contribution of distant areas to cosmic-ray neutron sensors – implications for footprint and sensitivity
Source: Copernicus journal article supplement (doi:10.5194/hess-27-723-2023), 2023-02-09
Supplement: Supplementary file 3 [file hess-27-723-2023-supplement.zip]

**Data table for the case of a drying remote field**

Input and output quantities:

1. Air humidity,  $h$  (g/m<sup>3</sup>),  
values: 1, 5, 10, 15
- 5 2. Main field soil moisture  $\theta_1$  (m<sup>3</sup>/m<sup>3</sup>),  
values: 0.01, 0.05, ..., 0.50 in steps of 0.05.
3. Difference in soil moisture  $\Delta\theta$  (m<sup>3</sup>/m<sup>3</sup>),  
values: 0.025, 0.05, 0.10, 0.15, 0.20
- 10 4. Remote field soil moisture  $\theta_2$  (m<sup>3</sup>/m<sup>3</sup>),  
values:  $\theta_2 = \theta_1 - \Delta\theta$  if  $\theta_2 > 0$ .
5. Relative precision threshold  $\sigma_N$  (-),  
values: 0.01, 0.02, 0.03
6. Estimated neutrons main field  $N_1$  (cph)
7. Estimated effective neutrons  $\hat{N}$  (cph)
- 15 8. Estimated effective soil moisture  $\hat{\theta}$  (m<sup>3</sup>/m<sup>3</sup>)
9. Minimal distance  $R$  (m)
10. Conventional footprint radius  $R_{86}$  (m)

| $h$ (g/m <sup>3</sup> ) | $\theta_1$ (m <sup>3</sup> /m <sup>3</sup> ) | $\Delta\theta$ (m <sup>3</sup> /m <sup>3</sup> ) | $\theta_2$ (m <sup>3</sup> /m <sup>3</sup> ) | $\sigma_N$ (-) | $N_1$ (cph) | $\hat{N}$ (cph) | $\hat{\theta}$ (m <sup>3</sup> /m <sup>3</sup> ) | $R$ (m) | $R_{86}$ (m) |
|-------------------------|----------------------------------------------|--------------------------------------------------|----------------------------------------------|----------------|-------------|-----------------|--------------------------------------------------|---------|--------------|
| 1                       | 0.060                                        | 0.025                                            | 0.035                                        | 0.02           | 1248        | 1273            | 0.056                                            | 81.3    | 229          |
| 1                       | 0.060                                        | 0.025                                            | 0.035                                        | 0.03           | 1248        | 1286            | 0.054                                            | 47.5    | 230          |
| 1                       | 0.060                                        | 0.050                                            | 0.010                                        | 0.01           | 1248        | 1261            | 0.058                                            | 263.1   | 229          |
| 1                       | 0.060                                        | 0.050                                            | 0.010                                        | 0.02           | 1248        | 1273            | 0.056                                            | 197.2   | 229          |
| 1                       | 0.060                                        | 0.050                                            | 0.010                                        | 0.03           | 1248        | 1286            | 0.054                                            | 157.7   | 230          |
| 1                       | 0.100                                        | 0.025                                            | 0.075                                        | 0.01           | 1083        | 1093            | 0.096                                            | 79.3    | 220          |
| 1                       | 0.100                                        | 0.025                                            | 0.075                                        | 0.02           | 1083        | 1104            | 0.093                                            | 24.7    | 223          |
| 1                       | 0.100                                        | 0.025                                            | 0.075                                        | 0.03           | 1083        | 1115            | 0.090                                            | 2.7     | 223          |
| 1                       | 0.100                                        | 0.050                                            | 0.050                                        | 0.01           | 1083        | 1093            | 0.096                                            | 167.2   | 220          |
| 1                       | 0.100                                        | 0.050                                            | 0.050                                        | 0.02           | 1083        | 1104            | 0.093                                            | 101.6   | 223          |
| 1                       | 0.100                                        | 0.050                                            | 0.050                                        | 0.03           | 1083        | 1115            | 0.090                                            | 66.3    | 223          |
| 1                       | 0.150                                        | 0.025                                            | 0.125                                        | 0.01           | 969         | 978             | 0.145                                            | 34.5    | 206          |
| 1                       | 0.150                                        | 0.025                                            | 0.125                                        | 0.02           | 969         | 988             | 0.140                                            | 1.4     | 206          |
| 1                       | 0.150                                        | 0.025                                            | 0.125                                        | 0.03           | 969         | 993             | 0.137                                            | 0.2     | 206          |
| 1                       | 0.150                                        | 0.050                                            | 0.100                                        | 0.01           | 969         | 978             | 0.145                                            | 100.9   | 206          |
| 1                       | 0.150                                        | 0.050                                            | 0.100                                        | 0.02           | 969         | 988             | 0.139                                            | 44.6    | 206          |
| 1                       | 0.150                                        | 0.050                                            | 0.100                                        | 0.03           | 969         | 998             | 0.135                                            | 16.8    | 210          |
| 1                       | 0.150                                        | 0.100                                            | 0.050                                        | 0.01           | 969         | 978             | 0.145                                            | 205.1   | 206          |
| 1                       | 0.150                                        | 0.100                                            | 0.050                                        | 0.02           | 969         | 988             | 0.139                                            | 138.9   | 206          |
| 1                       | 0.150                                        | 0.100                                            | 0.050                                        | 0.03           | 969         | 998             | 0.135                                            | 101.9   | 210          |
| 1                       | 0.200                                        | 0.025                                            | 0.175                                        | 0.01           | 895         | 904             | 0.193                                            | 11.2    | 186          |
| 1                       | 0.200                                        | 0.025                                            | 0.175                                        | 0.02           | 895         | 911             | 0.187                                            | 0.2     | 186          |
| 1                       | 0.200                                        | 0.025                                            | 0.175                                        | 0.03           | 895         | 911             | 0.187                                            | 0.2     | 186          |
| 1                       | 0.200                                        | 0.050                                            | 0.150                                        | 0.01           | 895         | 904             | 0.193                                            | 62.4    | 186          |
| 1                       | 0.200                                        | 0.050                                            | 0.150                                        | 0.02           | 895         | 913             | 0.186                                            | 16.2    | 186          |
| 1                       | 0.200                                        | 0.050                                            | 0.150                                        | 0.03           | 895         | 922             | 0.180                                            | 1.8     | 190          |
| 1                       | 0.200                                        | 0.100                                            | 0.100                                        | 0.01           | 895         | 904             | 0.193                                            | 141.2   | 186          |
| 1                       | 0.200                                        | 0.100                                            | 0.100                                        | 0.02           | 895         | 913             | 0.186                                            | 81.2    | 186          |
| 1                       | 0.200                                        | 0.100                                            | 0.100                                        | 0.03           | 895         | 922             | 0.180                                            | 50.2    | 190          |
| 1                       | 0.200                                        | 0.150                                            | 0.050                                        | 0.01           | 895         | 904             | 0.193                                            | 216.7   | 186          |
| 1                       | 0.200                                        | 0.150                                            | 0.050                                        | 0.02           | 895         | 913             | 0.186                                            | 151.5   | 186          |
| 1                       | 0.200                                        | 0.150                                            | 0.050                                        | 0.03           | 895         | 922             | 0.180                                            | 114.9   | 190          |
| 1                       | 0.250                                        | 0.025                                            | 0.225                                        | 0.01           | 840         | 849             | 0.241                                            | 2.6     | 167          |
| 1                       | 0.250                                        | 0.025                                            | 0.225                                        | 0.02           | 840         | 853             | 0.238                                            | 0.2     | 167          |
| 1                       | 0.250                                        | 0.025                                            | 0.225                                        | 0.03           | 840         | 853             | 0.238                                            | 0.2     | 167          |
| 1                       | 0.250                                        | 0.050                                            | 0.200                                        | 0.01           | 840         | 849             | 0.241                                            | 39.0    | 167          |
| 1                       | 0.250                                        | 0.050                                            | 0.200                                        | 0.02           | 840         | 857             | 0.233                                            | 3.8     | 171          |
| 1                       | 0.250                                        | 0.050                                            | 0.200                                        | 0.03           | 840         | 865             | 0.226                                            | 0.4     | 171          |
| 1                       | 0.250                                        | 0.100                                            | 0.150                                        | 0.01           | 840         | 849             | 0.241                                            | 102.0   | 167          |
| 1                       | 0.250                                        | 0.100                                            | 0.150                                        | 0.02           | 840         | 857             | 0.233                                            | 49.5    | 171          |
| 1                       | 0.250                                        | 0.100                                            | 0.150                                        | 0.03           | 840         | 866             | 0.225                                            | 24.4    | 171          |
| 1                       | 0.250                                        | 0.150                                            | 0.100                                        | 0.01           | 840         | 849             | 0.241                                            | 157.1   | 167          |
| 1                       | 0.250                                        | 0.150                                            | 0.100                                        | 0.02           | 840         | 857             | 0.233                                            | 97.2    | 171          |
| 1                       | 0.250                                        | 0.150                                            | 0.100                                        | 0.03           | 840         | 866             | 0.225                                            | 65.7    | 171          |
| 1                       | 0.250                                        | 0.200                                            | 0.050                                        | 0.01           | 840         | 849             | 0.241                                            | 218.9   | 167          |
| 1                       | 0.250                                        | 0.200                                            | 0.050                                        | 0.02           | 840         | 857             | 0.233                                            | 155.1   | 171          |
| 1                       | 0.250                                        | 0.200                                            | 0.050                                        | 0.03           | 840         | 866             | 0.225                                            | 119.4   | 171          |
| 1                       | 0.300                                        | 0.025                                            | 0.275                                        | 0.01           | 797         | 805             | 0.290                                            | 1.1     | 151          |
| 1                       | 0.300                                        | 0.025                                            | 0.275                                        | 0.02           | 797         | 807             | 0.288                                            | 0.2     | 151          |
| 1                       | 0.300                                        | 0.025                                            | 0.275                                        | 0.03           | 797         | 807             | 0.288                                            | 0.2     | 151          |
| 1                       | 0.300                                        | 0.050                                            | 0.250                                        | 0.01           | 797         | 805             | 0.290                                            | 24.8    | 151          |
| 1                       | 0.300                                        | 0.050                                            | 0.250                                        | 0.02           | 797         | 813             | 0.281                                            | 1.4     | 154          |
| 1                       | 0.300                                        | 0.050                                            | 0.250                                        | 0.03           | 797         | 818             | 0.275                                            | 0.2     | 157          |
| 1                       | 0.300                                        | 0.100                                            | 0.200                                        | 0.01           | 797         | 805             | 0.290                                            | 76.6    | 151          |
| 1                       | 0.300                                        | 0.100                                            | 0.200                                        | 0.02           | 797         | 813             | 0.281                                            | 31.3    | 154          |
| 1                       | 0.300                                        | 0.100                                            | 0.200                                        | 0.03           | 797         | 821             | 0.271                                            | 10.7    | 157          |
| 1                       | 0.300                                        | 0.150                                            | 0.150                                        | 0.01           | 797         | 805             | 0.290                                            | 120.4   | 151          |

| $h$ (g/m <sup>3</sup> ) | $\theta_1$ (m <sup>3</sup> /m <sup>3</sup> ) | $\Delta\theta$ (m <sup>3</sup> /m <sup>3</sup> ) | $\theta_2$ (m <sup>3</sup> /m <sup>3</sup> ) | $\sigma_N$ (-) | $N_1$ (cph) | $\hat{N}$ (cph) | $\hat{\theta}$ (m <sup>3</sup> /m <sup>3</sup> ) | $R$ (m) | $R_{86}$ (m) |
|-------------------------|----------------------------------------------|--------------------------------------------------|----------------------------------------------|----------------|-------------|-----------------|--------------------------------------------------|---------|--------------|
| 1                       | 0.300                                        | 0.150                                            | 0.150                                        | 0.02           | 797         | 813             | 0.281                                            | 66.9    | 154          |
| 1                       | 0.300                                        | 0.150                                            | 0.150                                        | 0.03           | 797         | 821             | 0.271                                            | 40.2    | 157          |
| 1                       | 0.300                                        | 0.200                                            | 0.100                                        | 0.01           | 797         | 805             | 0.290                                            | 164.1   | 151          |
| 1                       | 0.300                                        | 0.200                                            | 0.100                                        | 0.02           | 797         | 813             | 0.281                                            | 105.3   | 154          |
| 1                       | 0.300                                        | 0.200                                            | 0.100                                        | 0.03           | 797         | 821             | 0.271                                            | 74.2    | 157          |
| 1                       | 0.350                                        | 0.025                                            | 0.325                                        | 0.01           | 760         | 768             | 0.339                                            | 0.6     | 139          |
| 1                       | 0.350                                        | 0.025                                            | 0.325                                        | 0.02           | 760         | 769             | 0.338                                            | 0.2     | 139          |
| 1                       | 0.350                                        | 0.025                                            | 0.325                                        | 0.03           | 760         | 769             | 0.338                                            | 0.2     | 139          |
| 1                       | 0.350                                        | 0.050                                            | 0.300                                        | 0.01           | 760         | 768             | 0.339                                            | 15.7    | 139          |
| 1                       | 0.350                                        | 0.050                                            | 0.300                                        | 0.02           | 760         | 775             | 0.328                                            | 0.7     | 141          |
| 1                       | 0.350                                        | 0.050                                            | 0.300                                        | 0.03           | 760         | 778             | 0.325                                            | 0.2     | 143          |
| 1                       | 0.350                                        | 0.100                                            | 0.250                                        | 0.01           | 760         | 768             | 0.339                                            | 59.6    | 139          |
| 1                       | 0.350                                        | 0.100                                            | 0.250                                        | 0.02           | 760         | 775             | 0.328                                            | 20.2    | 141          |
| 1                       | 0.350                                        | 0.100                                            | 0.250                                        | 0.03           | 760         | 783             | 0.318                                            | 4.1     | 143          |
| 1                       | 0.350                                        | 0.150                                            | 0.200                                        | 0.01           | 760         | 768             | 0.339                                            | 96.7    | 139          |
| 1                       | 0.350                                        | 0.150                                            | 0.200                                        | 0.02           | 760         | 776             | 0.328                                            | 48.4    | 141          |
| 1                       | 0.350                                        | 0.150                                            | 0.200                                        | 0.03           | 760         | 783             | 0.318                                            | 25.9    | 143          |
| 1                       | 0.350                                        | 0.200                                            | 0.150                                        | 0.01           | 760         | 768             | 0.339                                            | 131.2   | 139          |
| 1                       | 0.350                                        | 0.200                                            | 0.150                                        | 0.02           | 760         | 776             | 0.328                                            | 77.8    | 141          |
| 1                       | 0.350                                        | 0.200                                            | 0.150                                        | 0.03           | 760         | 783             | 0.318                                            | 50.4    | 143          |
| 1                       | 0.400                                        | 0.025                                            | 0.375                                        | 0.01           | 729         | 736             | 0.388                                            | 0.2     | 131          |
| 1                       | 0.400                                        | 0.025                                            | 0.375                                        | 0.02           | 729         | 736             | 0.388                                            | 0.2     | 131          |
| 1                       | 0.400                                        | 0.025                                            | 0.375                                        | 0.03           | 729         | 736             | 0.388                                            | 0.2     | 131          |
| 1                       | 0.400                                        | 0.050                                            | 0.350                                        | 0.01           | 729         | 736             | 0.388                                            | 9.6     | 131          |
| 1                       | 0.400                                        | 0.050                                            | 0.350                                        | 0.02           | 729         | 744             | 0.376                                            | 0.3     | 132          |
| 1                       | 0.400                                        | 0.050                                            | 0.350                                        | 0.03           | 729         | 744             | 0.375                                            | 0.2     | 132          |
| 1                       | 0.400                                        | 0.100                                            | 0.300                                        | 0.01           | 729         | 736             | 0.388                                            | 48.1    | 131          |
| 1                       | 0.400                                        | 0.100                                            | 0.300                                        | 0.02           | 729         | 744             | 0.376                                            | 12.9    | 132          |
| 1                       | 0.400                                        | 0.100                                            | 0.300                                        | 0.03           | 729         | 751             | 0.364                                            | 2.1     | 135          |
| 1                       | 0.400                                        | 0.150                                            | 0.250                                        | 0.01           | 729         | 736             | 0.388                                            | 80.9    | 131          |
| 1                       | 0.400                                        | 0.150                                            | 0.250                                        | 0.02           | 729         | 744             | 0.376                                            | 37.2    | 132          |
| 1                       | 0.400                                        | 0.150                                            | 0.250                                        | 0.03           | 729         | 751             | 0.364                                            | 17.0    | 135          |
| 1                       | 0.400                                        | 0.200                                            | 0.200                                        | 0.01           | 729         | 736             | 0.388                                            | 110.3   | 131          |
| 1                       | 0.400                                        | 0.200                                            | 0.200                                        | 0.02           | 729         | 744             | 0.376                                            | 61.0    | 132          |
| 1                       | 0.400                                        | 0.200                                            | 0.200                                        | 0.03           | 729         | 751             | 0.364                                            | 36.9    | 135          |
| 1                       | 0.450                                        | 0.025                                            | 0.425                                        | 0.01           | 702         | 708             | 0.438                                            | 0.2     | 127          |
| 1                       | 0.450                                        | 0.025                                            | 0.425                                        | 0.02           | 702         | 708             | 0.438                                            | 0.2     | 127          |
| 1                       | 0.450                                        | 0.025                                            | 0.425                                        | 0.03           | 702         | 708             | 0.438                                            | 0.2     | 127          |
| 1                       | 0.450                                        | 0.050                                            | 0.400                                        | 0.01           | 702         | 709             | 0.437                                            | 5.7     | 127          |
| 1                       | 0.450                                        | 0.050                                            | 0.400                                        | 0.02           | 702         | 715             | 0.425                                            | 0.2     | 127          |
| 1                       | 0.450                                        | 0.050                                            | 0.400                                        | 0.03           | 702         | 715             | 0.425                                            | 0.2     | 127          |
| 1                       | 0.450                                        | 0.100                                            | 0.350                                        | 0.01           | 702         | 709             | 0.437                                            | 40.6    | 127          |
| 1                       | 0.450                                        | 0.100                                            | 0.350                                        | 0.02           | 702         | 716             | 0.424                                            | 8.0     | 128          |
| 1                       | 0.450                                        | 0.100                                            | 0.350                                        | 0.03           | 702         | 723             | 0.411                                            | 1.3     | 129          |
| 1                       | 0.450                                        | 0.150                                            | 0.300                                        | 0.01           | 702         | 709             | 0.437                                            | 70.3    | 127          |
| 1                       | 0.450                                        | 0.150                                            | 0.300                                        | 0.02           | 702         | 716             | 0.424                                            | 29.7    | 128          |
| 1                       | 0.450                                        | 0.150                                            | 0.300                                        | 0.03           | 702         | 723             | 0.411                                            | 11.0    | 129          |
| 1                       | 0.450                                        | 0.200                                            | 0.250                                        | 0.01           | 702         | 709             | 0.437                                            | 96.7    | 127          |
| 1                       | 0.450                                        | 0.200                                            | 0.250                                        | 0.02           | 702         | 716             | 0.423                                            | 50.1    | 128          |
| 1                       | 0.450                                        | 0.200                                            | 0.250                                        | 0.03           | 702         | 723             | 0.411                                            | 28.3    | 129          |
| 1                       | 0.500                                        | 0.025                                            | 0.475                                        | 0.01           | 678         | 683             | 0.488                                            | 0.2     | 126          |
| 1                       | 0.500                                        | 0.025                                            | 0.475                                        | 0.02           | 678         | 683             | 0.488                                            | 0.2     | 126          |
| 1                       | 0.500                                        | 0.025                                            | 0.475                                        | 0.03           | 678         | 683             | 0.488                                            | 0.2     | 126          |
| 1                       | 0.500                                        | 0.050                                            | 0.450                                        | 0.01           | 678         | 684             | 0.485                                            | 3.6     | 126          |
| 1                       | 0.500                                        | 0.050                                            | 0.450                                        | 0.02           | 678         | 689             | 0.475                                            | 0.2     | 126          |
| 1                       | 0.500                                        | 0.050                                            | 0.450                                        | 0.03           | 678         | 689             | 0.475                                            | 0.2     | 126          |
| 1                       | 0.500                                        | 0.100                                            | 0.400                                        | 0.01           | 678         | 684             | 0.485                                            | 35.3    | 126          |
| 1                       | 0.500                                        | 0.100                                            | 0.400                                        | 0.02           | 678         | 691             | 0.471                                            | 4.9     | 126          |

| $h$ (g/m <sup>3</sup> ) | $\theta_1$ (m <sup>3</sup> /m <sup>3</sup> ) | $\Delta\theta$ (m <sup>3</sup> /m <sup>3</sup> ) | $\theta_2$ (m <sup>3</sup> /m <sup>3</sup> ) | $\sigma_N$ (-) | $N_1$ (cph) | $\hat{N}$ (cph) | $\hat{\theta}$ (m <sup>3</sup> /m <sup>3</sup> ) | $R$ (m) | $R_{86}$ (m) |
|-------------------------|----------------------------------------------|--------------------------------------------------|----------------------------------------------|----------------|-------------|-----------------|--------------------------------------------------|---------|--------------|
| 1                       | 0.500                                        | 0.100                                            | 0.400                                        | 0.03           | 678         | 698             | 0.458                                            | 0.9     | 126          |
| 1                       | 0.500                                        | 0.150                                            | 0.350                                        | 0.01           | 678         | 684             | 0.485                                            | 63.1    | 126          |
| 1                       | 0.500                                        | 0.150                                            | 0.350                                        | 0.02           | 678         | 691             | 0.471                                            | 24.3    | 126          |
| 1                       | 0.500                                        | 0.150                                            | 0.350                                        | 0.03           | 678         | 698             | 0.458                                            | 6.9     | 126          |
| 1                       | 0.500                                        | 0.200                                            | 0.300                                        | 0.01           | 678         | 684             | 0.485                                            | 87.9    | 126          |
| 1                       | 0.500                                        | 0.200                                            | 0.300                                        | 0.02           | 678         | 691             | 0.471                                            | 43.1    | 126          |
| 1                       | 0.500                                        | 0.200                                            | 0.300                                        | 0.03           | 678         | 698             | 0.458                                            | 22.4    | 126          |
| 5                       | 0.060                                        | 0.025                                            | 0.035                                        | 0.01           | 1199        | 1210            | 0.058                                            | 140.2   | 218          |
| 5                       | 0.060                                        | 0.025                                            | 0.035                                        | 0.02           | 1199        | 1222            | 0.056                                            | 78.2    | 218          |
| 5                       | 0.060                                        | 0.025                                            | 0.035                                        | 0.03           | 1199        | 1234            | 0.054                                            | 45.7    | 218          |
| 5                       | 0.060                                        | 0.050                                            | 0.010                                        | 0.01           | 1199        | 1210            | 0.058                                            | 255.5   | 218          |
| 5                       | 0.060                                        | 0.050                                            | 0.010                                        | 0.02           | 1199        | 1222            | 0.056                                            | 190.6   | 218          |
| 5                       | 0.060                                        | 0.050                                            | 0.010                                        | 0.03           | 1199        | 1234            | 0.054                                            | 152.2   | 218          |
| 5                       | 0.100                                        | 0.025                                            | 0.075                                        | 0.01           | 1039        | 1049            | 0.096                                            | 76.2    | 209          |
| 5                       | 0.100                                        | 0.025                                            | 0.075                                        | 0.02           | 1039        | 1060            | 0.093                                            | 23.6    | 212          |
| 5                       | 0.100                                        | 0.025                                            | 0.075                                        | 0.03           | 1039        | 1070            | 0.090                                            | 2.7     | 212          |
| 5                       | 0.100                                        | 0.050                                            | 0.050                                        | 0.01           | 1039        | 1049            | 0.096                                            | 161.4   | 209          |
| 5                       | 0.100                                        | 0.050                                            | 0.050                                        | 0.02           | 1039        | 1060            | 0.093                                            | 97.8    | 212          |
| 5                       | 0.100                                        | 0.050                                            | 0.050                                        | 0.03           | 1039        | 1070            | 0.090                                            | 63.8    | 212          |
| 5                       | 0.150                                        | 0.025                                            | 0.125                                        | 0.01           | 930         | 939             | 0.145                                            | 33.0    | 196          |
| 5                       | 0.150                                        | 0.025                                            | 0.125                                        | 0.02           | 930         | 948             | 0.140                                            | 1.4     | 196          |
| 5                       | 0.150                                        | 0.025                                            | 0.125                                        | 0.03           | 930         | 953             | 0.137                                            | 0.2     | 196          |
| 5                       | 0.150                                        | 0.050                                            | 0.100                                        | 0.01           | 930         | 939             | 0.145                                            | 97.0    | 196          |
| 5                       | 0.150                                        | 0.050                                            | 0.100                                        | 0.02           | 930         | 948             | 0.140                                            | 42.8    | 196          |
| 5                       | 0.150                                        | 0.050                                            | 0.100                                        | 0.03           | 930         | 957             | 0.135                                            | 16.1    | 200          |
| 5                       | 0.150                                        | 0.100                                            | 0.050                                        | 0.01           | 930         | 939             | 0.145                                            | 198.3   | 196          |
| 5                       | 0.150                                        | 0.100                                            | 0.050                                        | 0.02           | 930         | 948             | 0.139                                            | 133.8   | 196          |
| 5                       | 0.150                                        | 0.100                                            | 0.050                                        | 0.03           | 930         | 958             | 0.135                                            | 98.1    | 200          |
| 5                       | 0.200                                        | 0.025                                            | 0.175                                        | 0.01           | 859         | 867             | 0.193                                            | 10.7    | 177          |
| 5                       | 0.200                                        | 0.025                                            | 0.175                                        | 0.02           | 859         | 875             | 0.187                                            | 0.2     | 177          |
| 5                       | 0.200                                        | 0.025                                            | 0.175                                        | 0.03           | 859         | 875             | 0.187                                            | 0.2     | 177          |
| 5                       | 0.200                                        | 0.050                                            | 0.150                                        | 0.01           | 859         | 867             | 0.193                                            | 59.9    | 177          |
| 5                       | 0.200                                        | 0.050                                            | 0.150                                        | 0.02           | 859         | 876             | 0.186                                            | 15.4    | 177          |
| 5                       | 0.200                                        | 0.050                                            | 0.150                                        | 0.03           | 859         | 884             | 0.180                                            | 1.8     | 181          |
| 5                       | 0.200                                        | 0.100                                            | 0.100                                        | 0.01           | 859         | 867             | 0.193                                            | 135.9   | 177          |
| 5                       | 0.200                                        | 0.100                                            | 0.100                                        | 0.02           | 859         | 876             | 0.186                                            | 78.0    | 177          |
| 5                       | 0.200                                        | 0.100                                            | 0.100                                        | 0.03           | 859         | 885             | 0.180                                            | 48.2    | 181          |
| 5                       | 0.200                                        | 0.150                                            | 0.050                                        | 0.01           | 859         | 867             | 0.193                                            | 209.5   | 177          |
| 5                       | 0.200                                        | 0.150                                            | 0.050                                        | 0.02           | 859         | 876             | 0.186                                            | 145.9   | 177          |
| 5                       | 0.200                                        | 0.150                                            | 0.050                                        | 0.03           | 859         | 885             | 0.180                                            | 110.5   | 181          |
| 5                       | 0.250                                        | 0.025                                            | 0.225                                        | 0.01           | 806         | 814             | 0.241                                            | 2.6     | 159          |
| 5                       | 0.250                                        | 0.025                                            | 0.225                                        | 0.02           | 806         | 818             | 0.238                                            | 0.2     | 159          |
| 5                       | 0.250                                        | 0.025                                            | 0.225                                        | 0.03           | 806         | 818             | 0.238                                            | 0.2     | 159          |
| 5                       | 0.250                                        | 0.050                                            | 0.200                                        | 0.01           | 806         | 815             | 0.241                                            | 37.4    | 159          |
| 5                       | 0.250                                        | 0.050                                            | 0.200                                        | 0.02           | 806         | 823             | 0.233                                            | 3.6     | 163          |
| 5                       | 0.250                                        | 0.050                                            | 0.200                                        | 0.03           | 806         | 830             | 0.226                                            | 0.4     | 163          |
| 5                       | 0.250                                        | 0.100                                            | 0.150                                        | 0.01           | 806         | 815             | 0.241                                            | 97.9    | 159          |
| 5                       | 0.250                                        | 0.100                                            | 0.150                                        | 0.02           | 806         | 823             | 0.233                                            | 47.5    | 163          |
| 5                       | 0.250                                        | 0.100                                            | 0.150                                        | 0.03           | 806         | 831             | 0.225                                            | 23.3    | 163          |
| 5                       | 0.250                                        | 0.150                                            | 0.100                                        | 0.01           | 806         | 815             | 0.241                                            | 151.1   | 159          |
| 5                       | 0.250                                        | 0.150                                            | 0.100                                        | 0.02           | 806         | 823             | 0.233                                            | 93.3    | 163          |
| 5                       | 0.250                                        | 0.150                                            | 0.100                                        | 0.03           | 806         | 831             | 0.225                                            | 63.1    | 163          |
| 5                       | 0.250                                        | 0.200                                            | 0.050                                        | 0.01           | 806         | 815             | 0.241                                            | 211.5   | 159          |
| 5                       | 0.250                                        | 0.200                                            | 0.050                                        | 0.02           | 806         | 823             | 0.233                                            | 149.3   | 163          |
| 5                       | 0.250                                        | 0.200                                            | 0.050                                        | 0.03           | 806         | 831             | 0.225                                            | 114.8   | 163          |
| 5                       | 0.300                                        | 0.025                                            | 0.275                                        | 0.01           | 765         | 772             | 0.290                                            | 1.1     | 144          |
| 5                       | 0.300                                        | 0.025                                            | 0.275                                        | 0.02           | 765         | 774             | 0.288                                            | 0.2     | 144          |
| 5                       | 0.300                                        | 0.025                                            | 0.275                                        | 0.03           | 765         | 774             | 0.288                                            | 0.2     | 144          |

| $h$ (g/m <sup>3</sup> ) | $\theta_1$ (m <sup>3</sup> /m <sup>3</sup> ) | $\Delta\theta$ (m <sup>3</sup> /m <sup>3</sup> ) | $\theta_2$ (m <sup>3</sup> /m <sup>3</sup> ) | $\sigma_N$ (-) | $N_1$ (cph) | $\hat{N}$ (cph) | $\hat{\theta}$ (m <sup>3</sup> /m <sup>3</sup> ) | $R$ (m) | $R_{86}$ (m) |
|-------------------------|----------------------------------------------|--------------------------------------------------|----------------------------------------------|----------------|-------------|-----------------|--------------------------------------------------|---------|--------------|
| 5                       | 0.300                                        | 0.050                                            | 0.250                                        | 0.01           | 765         | 772             | 0.290                                            | 23.7    | 144          |
| 5                       | 0.300                                        | 0.050                                            | 0.250                                        | 0.02           | 765         | 780             | 0.281                                            | 1.4     | 147          |
| 5                       | 0.300                                        | 0.050                                            | 0.250                                        | 0.03           | 765         | 785             | 0.275                                            | 0.2     | 150          |
| 5                       | 0.300                                        | 0.100                                            | 0.200                                        | 0.01           | 765         | 772             | 0.290                                            | 73.3    | 144          |
| 5                       | 0.300                                        | 0.100                                            | 0.200                                        | 0.02           | 765         | 780             | 0.281                                            | 30.0    | 147          |
| 5                       | 0.300                                        | 0.100                                            | 0.200                                        | 0.03           | 765         | 788             | 0.271                                            | 10.1    | 150          |
| 5                       | 0.300                                        | 0.150                                            | 0.150                                        | 0.01           | 765         | 772             | 0.290                                            | 115.5   | 144          |
| 5                       | 0.300                                        | 0.150                                            | 0.150                                        | 0.02           | 765         | 780             | 0.281                                            | 64.1    | 147          |
| 5                       | 0.300                                        | 0.150                                            | 0.150                                        | 0.03           | 765         | 788             | 0.271                                            | 38.6    | 150          |
| 5                       | 0.300                                        | 0.200                                            | 0.100                                        | 0.01           | 765         | 772             | 0.290                                            | 157.7   | 144          |
| 5                       | 0.300                                        | 0.200                                            | 0.100                                        | 0.02           | 765         | 780             | 0.281                                            | 101.1   | 147          |
| 5                       | 0.300                                        | 0.200                                            | 0.100                                        | 0.03           | 765         | 788             | 0.271                                            | 71.3    | 150          |
| 5                       | 0.350                                        | 0.025                                            | 0.325                                        | 0.01           | 730         | 737             | 0.339                                            | 0.5     | 132          |
| 5                       | 0.350                                        | 0.025                                            | 0.325                                        | 0.02           | 730         | 738             | 0.338                                            | 0.2     | 132          |
| 5                       | 0.350                                        | 0.025                                            | 0.325                                        | 0.03           | 730         | 738             | 0.338                                            | 0.2     | 132          |
| 5                       | 0.350                                        | 0.050                                            | 0.300                                        | 0.01           | 730         | 737             | 0.339                                            | 14.9    | 132          |
| 5                       | 0.350                                        | 0.050                                            | 0.300                                        | 0.02           | 730         | 744             | 0.328                                            | 0.7     | 134          |
| 5                       | 0.350                                        | 0.050                                            | 0.300                                        | 0.03           | 730         | 747             | 0.325                                            | 0.2     | 137          |
| 5                       | 0.350                                        | 0.100                                            | 0.250                                        | 0.01           | 730         | 737             | 0.339                                            | 57.0    | 132          |
| 5                       | 0.350                                        | 0.100                                            | 0.250                                        | 0.02           | 730         | 744             | 0.328                                            | 19.3    | 134          |
| 5                       | 0.350                                        | 0.100                                            | 0.250                                        | 0.03           | 730         | 752             | 0.318                                            | 3.9     | 137          |
| 5                       | 0.350                                        | 0.150                                            | 0.200                                        | 0.01           | 730         | 737             | 0.339                                            | 92.6    | 132          |
| 5                       | 0.350                                        | 0.150                                            | 0.200                                        | 0.02           | 730         | 744             | 0.328                                            | 46.4    | 134          |
| 5                       | 0.350                                        | 0.150                                            | 0.200                                        | 0.03           | 730         | 752             | 0.318                                            | 24.9    | 137          |
| 5                       | 0.350                                        | 0.200                                            | 0.150                                        | 0.01           | 730         | 737             | 0.339                                            | 125.8   | 132          |
| 5                       | 0.350                                        | 0.200                                            | 0.150                                        | 0.02           | 730         | 744             | 0.328                                            | 74.5    | 134          |
| 5                       | 0.350                                        | 0.200                                            | 0.150                                        | 0.03           | 730         | 752             | 0.318                                            | 48.3    | 137          |
| 5                       | 0.400                                        | 0.025                                            | 0.375                                        | 0.01           | 700         | 707             | 0.388                                            | 0.2     | 125          |
| 5                       | 0.400                                        | 0.025                                            | 0.375                                        | 0.02           | 700         | 707             | 0.388                                            | 0.2     | 125          |
| 5                       | 0.400                                        | 0.025                                            | 0.375                                        | 0.03           | 700         | 707             | 0.388                                            | 0.2     | 125          |
| 5                       | 0.400                                        | 0.050                                            | 0.350                                        | 0.01           | 700         | 707             | 0.388                                            | 9.1     | 125          |
| 5                       | 0.400                                        | 0.050                                            | 0.350                                        | 0.02           | 700         | 714             | 0.376                                            | 0.3     | 126          |
| 5                       | 0.400                                        | 0.050                                            | 0.350                                        | 0.03           | 700         | 714             | 0.375                                            | 0.2     | 126          |
| 5                       | 0.400                                        | 0.100                                            | 0.300                                        | 0.01           | 700         | 707             | 0.388                                            | 46.0    | 125          |
| 5                       | 0.400                                        | 0.100                                            | 0.300                                        | 0.02           | 700         | 714             | 0.376                                            | 12.2    | 126          |
| 5                       | 0.400                                        | 0.100                                            | 0.300                                        | 0.03           | 700         | 721             | 0.364                                            | 2.0     | 129          |
| 5                       | 0.400                                        | 0.150                                            | 0.250                                        | 0.01           | 700         | 707             | 0.388                                            | 77.3    | 125          |
| 5                       | 0.400                                        | 0.150                                            | 0.250                                        | 0.02           | 700         | 714             | 0.376                                            | 35.6    | 126          |
| 5                       | 0.400                                        | 0.150                                            | 0.250                                        | 0.03           | 700         | 721             | 0.364                                            | 16.2    | 129          |
| 5                       | 0.400                                        | 0.200                                            | 0.200                                        | 0.01           | 700         | 707             | 0.388                                            | 105.5   | 125          |
| 5                       | 0.400                                        | 0.200                                            | 0.200                                        | 0.02           | 700         | 714             | 0.376                                            | 58.3    | 126          |
| 5                       | 0.400                                        | 0.200                                            | 0.200                                        | 0.03           | 700         | 721             | 0.364                                            | 35.3    | 129          |
| 5                       | 0.450                                        | 0.025                                            | 0.425                                        | 0.01           | 674         | 680             | 0.438                                            | 0.2     | 121          |
| 5                       | 0.450                                        | 0.025                                            | 0.425                                        | 0.02           | 674         | 680             | 0.438                                            | 0.2     | 121          |
| 5                       | 0.450                                        | 0.025                                            | 0.425                                        | 0.03           | 674         | 680             | 0.438                                            | 0.2     | 121          |
| 5                       | 0.450                                        | 0.050                                            | 0.400                                        | 0.01           | 674         | 681             | 0.436                                            | 5.4     | 121          |
| 5                       | 0.450                                        | 0.050                                            | 0.400                                        | 0.02           | 674         | 687             | 0.425                                            | 0.2     | 121          |
| 5                       | 0.450                                        | 0.050                                            | 0.400                                        | 0.03           | 674         | 687             | 0.425                                            | 0.2     | 121          |
| 5                       | 0.450                                        | 0.100                                            | 0.350                                        | 0.01           | 674         | 681             | 0.436                                            | 38.7    | 121          |
| 5                       | 0.450                                        | 0.100                                            | 0.350                                        | 0.02           | 674         | 687             | 0.423                                            | 7.5     | 122          |
| 5                       | 0.450                                        | 0.100                                            | 0.350                                        | 0.03           | 674         | 694             | 0.411                                            | 1.3     | 123          |
| 5                       | 0.450                                        | 0.150                                            | 0.300                                        | 0.01           | 674         | 681             | 0.436                                            | 67.0    | 121          |
| 5                       | 0.450                                        | 0.150                                            | 0.300                                        | 0.02           | 674         | 687             | 0.423                                            | 28.3    | 122          |
| 5                       | 0.450                                        | 0.150                                            | 0.300                                        | 0.03           | 674         | 694             | 0.411                                            | 10.4    | 123          |
| 5                       | 0.450                                        | 0.200                                            | 0.250                                        | 0.01           | 674         | 681             | 0.436                                            | 92.3    | 121          |
| 5                       | 0.450                                        | 0.200                                            | 0.250                                        | 0.02           | 674         | 687             | 0.423                                            | 47.8    | 122          |
| 5                       | 0.450                                        | 0.200                                            | 0.250                                        | 0.03           | 674         | 694             | 0.411                                            | 27.0    | 123          |
| 5                       | 0.500                                        | 0.025                                            | 0.475                                        | 0.01           | 651         | 656             | 0.488                                            | 0.2     | 120          |

| $h$ (g/m <sup>3</sup> ) | $\theta_1$ (m <sup>3</sup> /m <sup>3</sup> ) | $\Delta\theta$ (m <sup>3</sup> /m <sup>3</sup> ) | $\theta_2$ (m <sup>3</sup> /m <sup>3</sup> ) | $\sigma_N$ (-) | $N_1$ (cph) | $\hat{N}$ (cph) | $\hat{\theta}$ (m <sup>3</sup> /m <sup>3</sup> ) | $R$ (m) | $R_{86}$ (m) |
|-------------------------|----------------------------------------------|--------------------------------------------------|----------------------------------------------|----------------|-------------|-----------------|--------------------------------------------------|---------|--------------|
| 5                       | 0.500                                        | 0.025                                            | 0.475                                        | 0.02           | 651         | 656             | 0.488                                            | 0.2     | 120          |
| 5                       | 0.500                                        | 0.025                                            | 0.475                                        | 0.03           | 651         | 656             | 0.488                                            | 0.2     | 120          |
| 5                       | 0.500                                        | 0.050                                            | 0.450                                        | 0.01           | 651         | 657             | 0.485                                            | 3.5     | 120          |
| 5                       | 0.500                                        | 0.050                                            | 0.450                                        | 0.02           | 651         | 662             | 0.475                                            | 0.2     | 120          |
| 5                       | 0.500                                        | 0.050                                            | 0.450                                        | 0.03           | 651         | 662             | 0.475                                            | 0.2     | 120          |
| 5                       | 0.500                                        | 0.100                                            | 0.400                                        | 0.01           | 651         | 657             | 0.485                                            | 33.6    | 120          |
| 5                       | 0.500                                        | 0.100                                            | 0.400                                        | 0.02           | 651         | 664             | 0.471                                            | 4.6     | 120          |
| 5                       | 0.500                                        | 0.100                                            | 0.400                                        | 0.03           | 651         | 670             | 0.458                                            | 0.9     | 120          |
| 5                       | 0.500                                        | 0.150                                            | 0.350                                        | 0.01           | 651         | 657             | 0.485                                            | 60.0    | 120          |
| 5                       | 0.500                                        | 0.150                                            | 0.350                                        | 0.02           | 651         | 664             | 0.471                                            | 23.1    | 120          |
| 5                       | 0.500                                        | 0.150                                            | 0.350                                        | 0.03           | 651         | 670             | 0.457                                            | 6.4     | 120          |
| 5                       | 0.500                                        | 0.200                                            | 0.300                                        | 0.01           | 651         | 657             | 0.485                                            | 83.7    | 120          |
| 5                       | 0.500                                        | 0.200                                            | 0.300                                        | 0.02           | 651         | 664             | 0.471                                            | 41.1    | 120          |
| 5                       | 0.500                                        | 0.200                                            | 0.300                                        | 0.03           | 651         | 670             | 0.457                                            | 21.2    | 120          |
| 10                      | 0.060                                        | 0.025                                            | 0.035                                        | 0.01           | 1139        | 1150            | 0.058                                            | 134.1   | 205          |
| 10                      | 0.060                                        | 0.025                                            | 0.035                                        | 0.02           | 1139        | 1162            | 0.056                                            | 74.7    | 205          |
| 10                      | 0.060                                        | 0.025                                            | 0.035                                        | 0.03           | 1139        | 1173            | 0.054                                            | 43.7    | 205          |
| 10                      | 0.060                                        | 0.050                                            | 0.010                                        | 0.01           | 1139        | 1150            | 0.058                                            | 246.4   | 205          |
| 10                      | 0.060                                        | 0.050                                            | 0.010                                        | 0.02           | 1139        | 1162            | 0.056                                            | 182.9   | 205          |
| 10                      | 0.060                                        | 0.050                                            | 0.010                                        | 0.03           | 1139        | 1173            | 0.054                                            | 145.8   | 205          |
| 10                      | 0.100                                        | 0.025                                            | 0.075                                        | 0.01           | 987         | 997             | 0.096                                            | 72.8    | 197          |
| 10                      | 0.100                                        | 0.025                                            | 0.075                                        | 0.02           | 987         | 1006            | 0.093                                            | 22.5    | 200          |
| 10                      | 0.100                                        | 0.025                                            | 0.075                                        | 0.03           | 987         | 1016            | 0.090                                            | 2.6     | 200          |
| 10                      | 0.100                                        | 0.050                                            | 0.050                                        | 0.01           | 987         | 997             | 0.096                                            | 154.5   | 197          |
| 10                      | 0.100                                        | 0.050                                            | 0.050                                        | 0.02           | 987         | 1006            | 0.093                                            | 93.5    | 200          |
| 10                      | 0.100                                        | 0.050                                            | 0.050                                        | 0.03           | 987         | 1016            | 0.090                                            | 61.0    | 200          |
| 10                      | 0.150                                        | 0.025                                            | 0.125                                        | 0.01           | 883         | 892             | 0.145                                            | 31.4    | 184          |
| 10                      | 0.150                                        | 0.025                                            | 0.125                                        | 0.02           | 883         | 900             | 0.140                                            | 1.3     | 184          |
| 10                      | 0.150                                        | 0.025                                            | 0.125                                        | 0.03           | 883         | 905             | 0.137                                            | 0.2     | 184          |
| 10                      | 0.150                                        | 0.050                                            | 0.100                                        | 0.01           | 883         | 892             | 0.145                                            | 92.5    | 184          |
| 10                      | 0.150                                        | 0.050                                            | 0.100                                        | 0.02           | 883         | 900             | 0.140                                            | 40.7    | 184          |
| 10                      | 0.150                                        | 0.050                                            | 0.100                                        | 0.03           | 883         | 909             | 0.135                                            | 15.2    | 188          |
| 10                      | 0.150                                        | 0.100                                            | 0.050                                        | 0.01           | 883         | 892             | 0.145                                            | 190.3   | 184          |
| 10                      | 0.150                                        | 0.100                                            | 0.050                                        | 0.02           | 883         | 900             | 0.140                                            | 128.0   | 184          |
| 10                      | 0.150                                        | 0.100                                            | 0.050                                        | 0.03           | 883         | 909             | 0.135                                            | 93.7    | 188          |
| 10                      | 0.200                                        | 0.025                                            | 0.175                                        | 0.01           | 816         | 824             | 0.193                                            | 10.0    | 167          |
| 10                      | 0.200                                        | 0.025                                            | 0.175                                        | 0.02           | 816         | 830             | 0.187                                            | 0.2     | 167          |
| 10                      | 0.200                                        | 0.025                                            | 0.175                                        | 0.03           | 816         | 830             | 0.187                                            | 0.2     | 167          |
| 10                      | 0.200                                        | 0.050                                            | 0.150                                        | 0.01           | 816         | 824             | 0.193                                            | 56.9    | 167          |
| 10                      | 0.200                                        | 0.050                                            | 0.150                                        | 0.02           | 816         | 832             | 0.186                                            | 14.5    | 167          |
| 10                      | 0.200                                        | 0.050                                            | 0.150                                        | 0.03           | 816         | 840             | 0.180                                            | 1.7     | 170          |
| 10                      | 0.200                                        | 0.100                                            | 0.100                                        | 0.01           | 816         | 824             | 0.193                                            | 129.6   | 167          |
| 10                      | 0.200                                        | 0.100                                            | 0.100                                        | 0.02           | 816         | 832             | 0.186                                            | 74.3    | 167          |
| 10                      | 0.200                                        | 0.100                                            | 0.100                                        | 0.03           | 816         | 840             | 0.180                                            | 45.9    | 170          |
| 10                      | 0.200                                        | 0.150                                            | 0.050                                        | 0.01           | 816         | 824             | 0.193                                            | 200.9   | 167          |
| 10                      | 0.200                                        | 0.150                                            | 0.050                                        | 0.02           | 816         | 832             | 0.186                                            | 139.4   | 167          |
| 10                      | 0.200                                        | 0.150                                            | 0.050                                        | 0.03           | 816         | 840             | 0.180                                            | 105.5   | 170          |
| 10                      | 0.250                                        | 0.025                                            | 0.225                                        | 0.01           | 766         | 774             | 0.241                                            | 2.4     | 150          |
| 10                      | 0.250                                        | 0.025                                            | 0.225                                        | 0.02           | 766         | 777             | 0.238                                            | 0.2     | 150          |
| 10                      | 0.250                                        | 0.025                                            | 0.225                                        | 0.03           | 766         | 777             | 0.238                                            | 0.2     | 150          |
| 10                      | 0.250                                        | 0.050                                            | 0.200                                        | 0.01           | 766         | 774             | 0.241                                            | 35.5    | 150          |
| 10                      | 0.250                                        | 0.050                                            | 0.200                                        | 0.02           | 766         | 781             | 0.233                                            | 3.4     | 153          |
| 10                      | 0.250                                        | 0.050                                            | 0.200                                        | 0.03           | 766         | 788             | 0.226                                            | 0.4     | 153          |
| 10                      | 0.250                                        | 0.100                                            | 0.150                                        | 0.01           | 766         | 774             | 0.241                                            | 93.1    | 150          |
| 10                      | 0.250                                        | 0.100                                            | 0.150                                        | 0.02           | 766         | 781             | 0.233                                            | 45.2    | 153          |
| 10                      | 0.250                                        | 0.100                                            | 0.150                                        | 0.03           | 766         | 789             | 0.225                                            | 22.1    | 153          |
| 10                      | 0.250                                        | 0.150                                            | 0.100                                        | 0.01           | 766         | 774             | 0.241                                            | 144.0   | 150          |
| 10                      | 0.250                                        | 0.150                                            | 0.100                                        | 0.02           | 766         | 781             | 0.233                                            | 88.8    | 153          |

| $h$ (g/m <sup>3</sup> ) | $\theta_1$ (m <sup>3</sup> /m <sup>3</sup> ) | $\Delta\theta$ (m <sup>3</sup> /m <sup>3</sup> ) | $\theta_2$ (m <sup>3</sup> /m <sup>3</sup> ) | $\sigma_N$ (-) | $N_1$ (cph) | $\hat{N}$ (cph) | $\hat{\theta}$ (m <sup>3</sup> /m <sup>3</sup> ) | $R$ (m) | $R_{86}$ (m) |
|-------------------------|----------------------------------------------|--------------------------------------------------|----------------------------------------------|----------------|-------------|-----------------|--------------------------------------------------|---------|--------------|
| 10                      | 0.250                                        | 0.150                                            | 0.100                                        | 0.03           | 766         | 789             | 0.225                                            | 60.1    | 153          |
| 10                      | 0.250                                        | 0.200                                            | 0.050                                        | 0.01           | 766         | 774             | 0.241                                            | 202.6   | 150          |
| 10                      | 0.250                                        | 0.200                                            | 0.050                                        | 0.02           | 766         | 781             | 0.233                                            | 142.5   | 153          |
| 10                      | 0.250                                        | 0.200                                            | 0.050                                        | 0.03           | 766         | 789             | 0.225                                            | 109.5   | 153          |
| 10                      | 0.300                                        | 0.025                                            | 0.275                                        | 0.01           | 726         | 734             | 0.290                                            | 1.1     | 136          |
| 10                      | 0.300                                        | 0.025                                            | 0.275                                        | 0.02           | 726         | 735             | 0.288                                            | 0.2     | 136          |
| 10                      | 0.300                                        | 0.025                                            | 0.275                                        | 0.03           | 726         | 735             | 0.288                                            | 0.2     | 136          |
| 10                      | 0.300                                        | 0.050                                            | 0.250                                        | 0.01           | 726         | 734             | 0.290                                            | 22.4    | 136          |
| 10                      | 0.300                                        | 0.050                                            | 0.250                                        | 0.02           | 726         | 741             | 0.280                                            | 1.3     | 138          |
| 10                      | 0.300                                        | 0.050                                            | 0.250                                        | 0.03           | 726         | 745             | 0.275                                            | 0.2     | 141          |
| 10                      | 0.300                                        | 0.100                                            | 0.200                                        | 0.01           | 726         | 734             | 0.290                                            | 69.5    | 136          |
| 10                      | 0.300                                        | 0.100                                            | 0.200                                        | 0.02           | 726         | 741             | 0.280                                            | 28.5    | 138          |
| 10                      | 0.300                                        | 0.100                                            | 0.200                                        | 0.03           | 726         | 748             | 0.271                                            | 9.5     | 141          |
| 10                      | 0.300                                        | 0.150                                            | 0.150                                        | 0.01           | 726         | 734             | 0.290                                            | 109.8   | 136          |
| 10                      | 0.300                                        | 0.150                                            | 0.150                                        | 0.02           | 726         | 741             | 0.280                                            | 60.9    | 138          |
| 10                      | 0.300                                        | 0.150                                            | 0.150                                        | 0.03           | 726         | 748             | 0.271                                            | 36.7    | 141          |
| 10                      | 0.300                                        | 0.200                                            | 0.100                                        | 0.01           | 726         | 734             | 0.290                                            | 150.2   | 136          |
| 10                      | 0.300                                        | 0.200                                            | 0.100                                        | 0.02           | 726         | 741             | 0.280                                            | 96.1    | 138          |
| 10                      | 0.300                                        | 0.200                                            | 0.100                                        | 0.03           | 726         | 748             | 0.271                                            | 67.8    | 141          |
| 10                      | 0.350                                        | 0.025                                            | 0.325                                        | 0.01           | 694         | 700             | 0.339                                            | 0.5     | 125          |
| 10                      | 0.350                                        | 0.025                                            | 0.325                                        | 0.02           | 694         | 701             | 0.338                                            | 0.2     | 125          |
| 10                      | 0.350                                        | 0.025                                            | 0.325                                        | 0.03           | 694         | 701             | 0.338                                            | 0.2     | 125          |
| 10                      | 0.350                                        | 0.050                                            | 0.300                                        | 0.01           | 694         | 700             | 0.339                                            | 14.0    | 125          |
| 10                      | 0.350                                        | 0.050                                            | 0.300                                        | 0.02           | 694         | 707             | 0.328                                            | 0.7     | 127          |
| 10                      | 0.350                                        | 0.050                                            | 0.300                                        | 0.03           | 694         | 709             | 0.325                                            | 0.2     | 129          |
| 10                      | 0.350                                        | 0.100                                            | 0.250                                        | 0.01           | 694         | 700             | 0.339                                            | 53.9    | 125          |
| 10                      | 0.350                                        | 0.100                                            | 0.250                                        | 0.02           | 694         | 707             | 0.328                                            | 18.2    | 127          |
| 10                      | 0.350                                        | 0.100                                            | 0.250                                        | 0.03           | 694         | 714             | 0.318                                            | 3.7     | 129          |
| 10                      | 0.350                                        | 0.150                                            | 0.200                                        | 0.01           | 694         | 700             | 0.339                                            | 87.7    | 125          |
| 10                      | 0.350                                        | 0.150                                            | 0.200                                        | 0.02           | 694         | 707             | 0.328                                            | 44.0    | 127          |
| 10                      | 0.350                                        | 0.150                                            | 0.200                                        | 0.03           | 694         | 714             | 0.317                                            | 23.5    | 129          |
| 10                      | 0.350                                        | 0.200                                            | 0.150                                        | 0.01           | 694         | 700             | 0.339                                            | 119.4   | 125          |
| 10                      | 0.350                                        | 0.200                                            | 0.150                                        | 0.02           | 694         | 707             | 0.328                                            | 70.7    | 127          |
| 10                      | 0.350                                        | 0.200                                            | 0.150                                        | 0.03           | 694         | 714             | 0.317                                            | 45.9    | 129          |
| 10                      | 0.400                                        | 0.025                                            | 0.375                                        | 0.01           | 665         | 672             | 0.388                                            | 0.2     | 118          |
| 10                      | 0.400                                        | 0.025                                            | 0.375                                        | 0.02           | 665         | 672             | 0.388                                            | 0.2     | 118          |
| 10                      | 0.400                                        | 0.025                                            | 0.375                                        | 0.03           | 665         | 672             | 0.388                                            | 0.2     | 118          |
| 10                      | 0.400                                        | 0.050                                            | 0.350                                        | 0.01           | 665         | 672             | 0.388                                            | 8.4     | 118          |
| 10                      | 0.400                                        | 0.050                                            | 0.350                                        | 0.02           | 665         | 679             | 0.376                                            | 0.3     | 119          |
| 10                      | 0.400                                        | 0.050                                            | 0.350                                        | 0.03           | 665         | 679             | 0.375                                            | 0.2     | 119          |
| 10                      | 0.400                                        | 0.100                                            | 0.300                                        | 0.01           | 665         | 672             | 0.388                                            | 43.5    | 118          |
| 10                      | 0.400                                        | 0.100                                            | 0.300                                        | 0.02           | 665         | 679             | 0.375                                            | 11.4    | 119          |
| 10                      | 0.400                                        | 0.100                                            | 0.300                                        | 0.03           | 665         | 685             | 0.364                                            | 2.0     | 122          |
| 10                      | 0.400                                        | 0.150                                            | 0.250                                        | 0.01           | 665         | 672             | 0.388                                            | 73.1    | 118          |
| 10                      | 0.400                                        | 0.150                                            | 0.250                                        | 0.02           | 665         | 679             | 0.375                                            | 33.7    | 119          |
| 10                      | 0.400                                        | 0.150                                            | 0.250                                        | 0.03           | 665         | 685             | 0.364                                            | 15.2    | 122          |
| 10                      | 0.400                                        | 0.200                                            | 0.200                                        | 0.01           | 665         | 672             | 0.388                                            | 99.9    | 118          |
| 10                      | 0.400                                        | 0.200                                            | 0.200                                        | 0.02           | 665         | 679             | 0.375                                            | 55.1    | 119          |
| 10                      | 0.400                                        | 0.200                                            | 0.200                                        | 0.03           | 665         | 685             | 0.364                                            | 33.5    | 122          |
| 10                      | 0.450                                        | 0.025                                            | 0.425                                        | 0.01           | 641         | 647             | 0.438                                            | 0.2     | 114          |
| 10                      | 0.450                                        | 0.025                                            | 0.425                                        | 0.02           | 641         | 647             | 0.438                                            | 0.2     | 114          |
| 10                      | 0.450                                        | 0.025                                            | 0.425                                        | 0.03           | 641         | 647             | 0.438                                            | 0.2     | 114          |
| 10                      | 0.450                                        | 0.050                                            | 0.400                                        | 0.01           | 641         | 647             | 0.436                                            | 4.9     | 114          |
| 10                      | 0.450                                        | 0.050                                            | 0.400                                        | 0.02           | 641         | 653             | 0.425                                            | 0.2     | 114          |
| 10                      | 0.450                                        | 0.050                                            | 0.400                                        | 0.03           | 641         | 653             | 0.425                                            | 0.2     | 114          |
| 10                      | 0.450                                        | 0.100                                            | 0.350                                        | 0.01           | 641         | 647             | 0.436                                            | 36.5    | 114          |
| 10                      | 0.450                                        | 0.100                                            | 0.350                                        | 0.02           | 641         | 654             | 0.423                                            | 6.9     | 115          |
| 10                      | 0.450                                        | 0.100                                            | 0.350                                        | 0.03           | 641         | 660             | 0.410                                            | 1.2     | 116          |

| $h$ (g/m <sup>3</sup> ) | $\theta_1$ (m <sup>3</sup> /m <sup>3</sup> ) | $\Delta\theta$ (m <sup>3</sup> /m <sup>3</sup> ) | $\theta_2$ (m <sup>3</sup> /m <sup>3</sup> ) | $\sigma_N$ (-) | $N_1$ (cph) | $\hat{N}$ (cph) | $\hat{\theta}$ (m <sup>3</sup> /m <sup>3</sup> ) | $R$ (m) | $R_{86}$ (m) |
|-------------------------|----------------------------------------------|--------------------------------------------------|----------------------------------------------|----------------|-------------|-----------------|--------------------------------------------------|---------|--------------|
| 10                      | 0.450                                        | 0.150                                            | 0.300                                        | 0.01           | 641         | 647             | 0.436                                            | 63.1    | 114          |
| 10                      | 0.450                                        | 0.150                                            | 0.300                                        | 0.02           | 641         | 654             | 0.423                                            | 26.7    | 115          |
| 10                      | 0.450                                        | 0.150                                            | 0.300                                        | 0.03           | 641         | 660             | 0.410                                            | 9.6     | 116          |
| 10                      | 0.450                                        | 0.200                                            | 0.250                                        | 0.01           | 641         | 647             | 0.436                                            | 87.2    | 114          |
| 10                      | 0.450                                        | 0.200                                            | 0.250                                        | 0.02           | 641         | 654             | 0.423                                            | 45.1    | 115          |
| 10                      | 0.450                                        | 0.200                                            | 0.250                                        | 0.03           | 641         | 660             | 0.410                                            | 25.5    | 116          |
| 10                      | 0.500                                        | 0.025                                            | 0.475                                        | 0.01           | 619         | 624             | 0.488                                            | 0.2     | 113          |
| 10                      | 0.500                                        | 0.025                                            | 0.475                                        | 0.02           | 619         | 624             | 0.488                                            | 0.2     | 113          |
| 10                      | 0.500                                        | 0.025                                            | 0.475                                        | 0.03           | 619         | 624             | 0.488                                            | 0.2     | 113          |
| 10                      | 0.500                                        | 0.050                                            | 0.450                                        | 0.01           | 619         | 625             | 0.485                                            | 3.2     | 113          |
| 10                      | 0.500                                        | 0.050                                            | 0.450                                        | 0.02           | 619         | 630             | 0.475                                            | 0.2     | 113          |
| 10                      | 0.500                                        | 0.050                                            | 0.450                                        | 0.03           | 619         | 630             | 0.475                                            | 0.2     | 113          |
| 10                      | 0.500                                        | 0.100                                            | 0.400                                        | 0.01           | 619         | 625             | 0.485                                            | 31.5    | 113          |
| 10                      | 0.500                                        | 0.100                                            | 0.400                                        | 0.02           | 619         | 632             | 0.471                                            | 4.2     | 113          |
| 10                      | 0.500                                        | 0.100                                            | 0.400                                        | 0.03           | 619         | 638             | 0.457                                            | 0.8     | 113          |
| 10                      | 0.500                                        | 0.150                                            | 0.350                                        | 0.01           | 619         | 625             | 0.485                                            | 56.3    | 113          |
| 10                      | 0.500                                        | 0.150                                            | 0.350                                        | 0.02           | 619         | 632             | 0.471                                            | 21.6    | 113          |
| 10                      | 0.500                                        | 0.150                                            | 0.350                                        | 0.03           | 619         | 638             | 0.457                                            | 5.9     | 113          |
| 10                      | 0.500                                        | 0.200                                            | 0.300                                        | 0.01           | 619         | 625             | 0.485                                            | 78.7    | 113          |
| 10                      | 0.500                                        | 0.200                                            | 0.300                                        | 0.02           | 619         | 632             | 0.471                                            | 38.7    | 113          |
| 10                      | 0.500                                        | 0.200                                            | 0.300                                        | 0.03           | 619         | 638             | 0.457                                            | 19.9    | 113          |
| 15                      | 0.060                                        | 0.025                                            | 0.035                                        | 0.01           | 1083        | 1093            | 0.058                                            | 128.5   | 193          |
| 15                      | 0.060                                        | 0.025                                            | 0.035                                        | 0.02           | 1083        | 1104            | 0.056                                            | 71.6    | 193          |
| 15                      | 0.060                                        | 0.025                                            | 0.035                                        | 0.03           | 1083        | 1115            | 0.054                                            | 41.9    | 193          |
| 15                      | 0.060                                        | 0.050                                            | 0.010                                        | 0.01           | 1083        | 1093            | 0.058                                            | 237.7   | 193          |
| 15                      | 0.060                                        | 0.050                                            | 0.010                                        | 0.02           | 1083        | 1104            | 0.056                                            | 175.7   | 193          |
| 15                      | 0.060                                        | 0.050                                            | 0.010                                        | 0.03           | 1083        | 1115            | 0.054                                            | 139.8   | 193          |
| 15                      | 0.100                                        | 0.025                                            | 0.075                                        | 0.01           | 937         | 946             | 0.096                                            | 69.6    | 186          |
| 15                      | 0.100                                        | 0.025                                            | 0.075                                        | 0.02           | 937         | 956             | 0.093                                            | 21.5    | 188          |
| 15                      | 0.100                                        | 0.025                                            | 0.075                                        | 0.03           | 937         | 965             | 0.090                                            | 2.6     | 188          |
| 15                      | 0.100                                        | 0.050                                            | 0.050                                        | 0.01           | 937         | 946             | 0.096                                            | 148.2   | 186          |
| 15                      | 0.100                                        | 0.050                                            | 0.050                                        | 0.02           | 937         | 956             | 0.093                                            | 89.5    | 188          |
| 15                      | 0.100                                        | 0.050                                            | 0.050                                        | 0.03           | 937         | 965             | 0.090                                            | 58.4    | 188          |
| 15                      | 0.150                                        | 0.025                                            | 0.125                                        | 0.01           | 838         | 846             | 0.145                                            | 29.9    | 174          |
| 15                      | 0.150                                        | 0.025                                            | 0.125                                        | 0.02           | 838         | 855             | 0.140                                            | 1.3     | 174          |
| 15                      | 0.150                                        | 0.025                                            | 0.125                                        | 0.03           | 838         | 859             | 0.137                                            | 0.2     | 174          |
| 15                      | 0.150                                        | 0.050                                            | 0.100                                        | 0.01           | 838         | 846             | 0.145                                            | 88.3    | 174          |
| 15                      | 0.150                                        | 0.050                                            | 0.100                                        | 0.02           | 838         | 855             | 0.140                                            | 38.9    | 174          |
| 15                      | 0.150                                        | 0.050                                            | 0.100                                        | 0.03           | 838         | 863             | 0.135                                            | 14.5    | 177          |
| 15                      | 0.150                                        | 0.100                                            | 0.050                                        | 0.01           | 838         | 846             | 0.145                                            | 182.7   | 174          |
| 15                      | 0.150                                        | 0.100                                            | 0.050                                        | 0.02           | 838         | 855             | 0.140                                            | 122.5   | 174          |
| 15                      | 0.150                                        | 0.100                                            | 0.050                                        | 0.03           | 838         | 863             | 0.135                                            | 89.7    | 177          |
| 15                      | 0.200                                        | 0.025                                            | 0.175                                        | 0.01           | 774         | 782             | 0.193                                            | 9.3     | 157          |
| 15                      | 0.200                                        | 0.025                                            | 0.175                                        | 0.02           | 774         | 788             | 0.187                                            | 0.2     | 157          |
| 15                      | 0.200                                        | 0.025                                            | 0.175                                        | 0.03           | 774         | 788             | 0.187                                            | 0.2     | 157          |
| 15                      | 0.200                                        | 0.050                                            | 0.150                                        | 0.01           | 774         | 782             | 0.193                                            | 54.2    | 157          |
| 15                      | 0.200                                        | 0.050                                            | 0.150                                        | 0.02           | 774         | 790             | 0.186                                            | 13.7    | 157          |
| 15                      | 0.200                                        | 0.050                                            | 0.150                                        | 0.03           | 774         | 797             | 0.180                                            | 1.7     | 161          |
| 15                      | 0.200                                        | 0.100                                            | 0.100                                        | 0.01           | 774         | 782             | 0.193                                            | 123.8   | 157          |
| 15                      | 0.200                                        | 0.100                                            | 0.100                                        | 0.02           | 774         | 790             | 0.186                                            | 70.9    | 157          |
| 15                      | 0.200                                        | 0.100                                            | 0.100                                        | 0.03           | 774         | 797             | 0.180                                            | 43.8    | 161          |
| 15                      | 0.200                                        | 0.150                                            | 0.050                                        | 0.01           | 774         | 782             | 0.193                                            | 192.8   | 157          |
| 15                      | 0.200                                        | 0.150                                            | 0.050                                        | 0.02           | 774         | 790             | 0.186                                            | 133.4   | 157          |
| 15                      | 0.200                                        | 0.150                                            | 0.050                                        | 0.03           | 774         | 797             | 0.180                                            | 100.9   | 161          |
| 15                      | 0.250                                        | 0.025                                            | 0.225                                        | 0.01           | 727         | 735             | 0.241                                            | 2.3     | 141          |
| 15                      | 0.250                                        | 0.025                                            | 0.225                                        | 0.02           | 727         | 738             | 0.238                                            | 0.2     | 141          |
| 15                      | 0.250                                        | 0.025                                            | 0.225                                        | 0.03           | 727         | 738             | 0.238                                            | 0.2     | 141          |
| 15                      | 0.250                                        | 0.050                                            | 0.200                                        | 0.01           | 727         | 735             | 0.241                                            | 33.7    | 141          |



| $h$ (g/m <sup>3</sup> ) | $\theta_1$ (m <sup>3</sup> /m <sup>3</sup> ) | $\Delta\theta$ (m <sup>3</sup> /m <sup>3</sup> ) | $\theta_2$ (m <sup>3</sup> /m <sup>3</sup> ) | $\sigma_N$ (-) | $N_1$ (cph) | $\hat{N}$ (cph) | $\hat{\theta}$ (m <sup>3</sup> /m <sup>3</sup> ) | $R$ (m) | $R_{86}$ (m) |
|-------------------------|----------------------------------------------|--------------------------------------------------|----------------------------------------------|----------------|-------------|-----------------|--------------------------------------------------|---------|--------------|
| 15                      | 0.250                                        | 0.050                                            | 0.200                                        | 0.02           | 727         | 742             | 0.233                                            | 3.2     | 144          |
| 15                      | 0.250                                        | 0.050                                            | 0.200                                        | 0.03           | 727         | 749             | 0.226                                            | 0.4     | 144          |
| 15                      | 0.250                                        | 0.100                                            | 0.150                                        | 0.01           | 727         | 735             | 0.241                                            | 88.5    | 141          |
| 15                      | 0.250                                        | 0.100                                            | 0.150                                        | 0.02           | 727         | 742             | 0.233                                            | 43.0    | 144          |
| 15                      | 0.250                                        | 0.100                                            | 0.150                                        | 0.03           | 727         | 749             | 0.225                                            | 21.0    | 144          |
| 15                      | 0.250                                        | 0.150                                            | 0.100                                        | 0.01           | 727         | 735             | 0.241                                            | 137.4   | 141          |
| 15                      | 0.250                                        | 0.150                                            | 0.100                                        | 0.02           | 727         | 742             | 0.233                                            | 84.7    | 144          |
| 15                      | 0.250                                        | 0.150                                            | 0.100                                        | 0.03           | 727         | 749             | 0.225                                            | 57.3    | 144          |
| 15                      | 0.250                                        | 0.200                                            | 0.050                                        | 0.01           | 727         | 735             | 0.241                                            | 194.2   | 141          |
| 15                      | 0.250                                        | 0.200                                            | 0.050                                        | 0.02           | 727         | 742             | 0.233                                            | 136.2   | 144          |
| 15                      | 0.250                                        | 0.200                                            | 0.050                                        | 0.03           | 727         | 749             | 0.225                                            | 104.6   | 144          |
| 15                      | 0.300                                        | 0.025                                            | 0.275                                        | 0.01           | 690         | 697             | 0.290                                            | 1.0     | 128          |
| 15                      | 0.300                                        | 0.025                                            | 0.275                                        | 0.02           | 690         | 699             | 0.288                                            | 0.2     | 128          |
| 15                      | 0.300                                        | 0.025                                            | 0.275                                        | 0.03           | 690         | 699             | 0.288                                            | 0.2     | 128          |
| 15                      | 0.300                                        | 0.050                                            | 0.250                                        | 0.01           | 690         | 697             | 0.290                                            | 21.1    | 128          |
| 15                      | 0.300                                        | 0.050                                            | 0.250                                        | 0.02           | 690         | 704             | 0.280                                            | 1.3     | 131          |
| 15                      | 0.300                                        | 0.050                                            | 0.250                                        | 0.03           | 690         | 708             | 0.275                                            | 0.2     | 133          |
| 15                      | 0.300                                        | 0.100                                            | 0.200                                        | 0.01           | 690         | 697             | 0.290                                            | 66.0    | 128          |
| 15                      | 0.300                                        | 0.100                                            | 0.200                                        | 0.02           | 690         | 704             | 0.280                                            | 27.0    | 131          |
| 15                      | 0.300                                        | 0.100                                            | 0.200                                        | 0.03           | 690         | 711             | 0.271                                            | 8.8     | 133          |
| 15                      | 0.300                                        | 0.150                                            | 0.150                                        | 0.01           | 690         | 697             | 0.290                                            | 104.4   | 128          |
| 15                      | 0.300                                        | 0.150                                            | 0.150                                        | 0.02           | 690         | 704             | 0.280                                            | 57.9    | 131          |
| 15                      | 0.300                                        | 0.150                                            | 0.150                                        | 0.03           | 690         | 711             | 0.271                                            | 35.0    | 133          |
| 15                      | 0.300                                        | 0.200                                            | 0.100                                        | 0.01           | 690         | 697             | 0.290                                            | 143.2   | 128          |
| 15                      | 0.300                                        | 0.200                                            | 0.100                                        | 0.02           | 690         | 704             | 0.280                                            | 91.5    | 131          |
| 15                      | 0.300                                        | 0.200                                            | 0.100                                        | 0.03           | 690         | 711             | 0.271                                            | 64.5    | 133          |
| 15                      | 0.350                                        | 0.025                                            | 0.325                                        | 0.01           | 659         | 666             | 0.339                                            | 0.5     | 118          |
| 15                      | 0.350                                        | 0.025                                            | 0.325                                        | 0.02           | 659         | 666             | 0.338                                            | 0.2     | 118          |
| 15                      | 0.350                                        | 0.025                                            | 0.325                                        | 0.03           | 659         | 666             | 0.338                                            | 0.2     | 118          |
| 15                      | 0.350                                        | 0.050                                            | 0.300                                        | 0.01           | 659         | 666             | 0.339                                            | 13.0    | 118          |
| 15                      | 0.350                                        | 0.050                                            | 0.300                                        | 0.02           | 659         | 672             | 0.328                                            | 0.6     | 120          |
| 15                      | 0.350                                        | 0.050                                            | 0.300                                        | 0.03           | 659         | 674             | 0.325                                            | 0.2     | 122          |
| 15                      | 0.350                                        | 0.100                                            | 0.250                                        | 0.01           | 659         | 666             | 0.339                                            | 50.9    | 118          |
| 15                      | 0.350                                        | 0.100                                            | 0.250                                        | 0.02           | 659         | 672             | 0.328                                            | 17.1    | 120          |
| 15                      | 0.350                                        | 0.100                                            | 0.250                                        | 0.03           | 659         | 679             | 0.317                                            | 3.4     | 122          |
| 15                      | 0.350                                        | 0.150                                            | 0.200                                        | 0.01           | 659         | 666             | 0.339                                            | 83.2    | 118          |
| 15                      | 0.350                                        | 0.150                                            | 0.200                                        | 0.02           | 659         | 672             | 0.328                                            | 41.8    | 120          |
| 15                      | 0.350                                        | 0.150                                            | 0.200                                        | 0.03           | 659         | 679             | 0.317                                            | 22.3    | 122          |
| 15                      | 0.350                                        | 0.200                                            | 0.150                                        | 0.01           | 659         | 666             | 0.339                                            | 113.4   | 118          |
| 15                      | 0.350                                        | 0.200                                            | 0.150                                        | 0.02           | 659         | 672             | 0.328                                            | 67.1    | 120          |
| 15                      | 0.350                                        | 0.200                                            | 0.150                                        | 0.03           | 659         | 679             | 0.317                                            | 43.6    | 122          |
| 15                      | 0.400                                        | 0.025                                            | 0.375                                        | 0.01           | 633         | 639             | 0.388                                            | 0.2     | 111          |
| 15                      | 0.400                                        | 0.025                                            | 0.375                                        | 0.02           | 633         | 639             | 0.388                                            | 0.2     | 111          |
| 15                      | 0.400                                        | 0.025                                            | 0.375                                        | 0.03           | 633         | 639             | 0.388                                            | 0.2     | 111          |
| 15                      | 0.400                                        | 0.050                                            | 0.350                                        | 0.01           | 633         | 639             | 0.387                                            | 7.7     | 111          |
| 15                      | 0.400                                        | 0.050                                            | 0.350                                        | 0.02           | 633         | 645             | 0.376                                            | 0.3     | 112          |
| 15                      | 0.400                                        | 0.050                                            | 0.350                                        | 0.03           | 633         | 645             | 0.375                                            | 0.2     | 112          |
| 15                      | 0.400                                        | 0.100                                            | 0.300                                        | 0.01           | 633         | 639             | 0.387                                            | 41.1    | 111          |
| 15                      | 0.400                                        | 0.100                                            | 0.300                                        | 0.02           | 633         | 645             | 0.375                                            | 10.6    | 112          |
| 15                      | 0.400                                        | 0.100                                            | 0.300                                        | 0.03           | 633         | 651             | 0.364                                            | 1.9     | 115          |
| 15                      | 0.400                                        | 0.150                                            | 0.250                                        | 0.01           | 633         | 639             | 0.387                                            | 69.0    | 111          |
| 15                      | 0.400                                        | 0.150                                            | 0.250                                        | 0.02           | 633         | 645             | 0.375                                            | 31.9    | 112          |
| 15                      | 0.400                                        | 0.150                                            | 0.250                                        | 0.03           | 633         | 652             | 0.363                                            | 14.2    | 115          |
| 15                      | 0.400                                        | 0.200                                            | 0.200                                        | 0.01           | 633         | 639             | 0.387                                            | 94.6    | 111          |
| 15                      | 0.400                                        | 0.200                                            | 0.200                                        | 0.02           | 633         | 645             | 0.375                                            | 52.1    | 112          |
| 15                      | 0.400                                        | 0.200                                            | 0.200                                        | 0.03           | 633         | 652             | 0.363                                            | 31.7    | 115          |
| 15                      | 0.450                                        | 0.025                                            | 0.425                                        | 0.01           | 610         | 615             | 0.438                                            | 0.2     | 108          |
| 15                      | 0.450                                        | 0.025                                            | 0.425                                        | 0.02           | 610         | 615             | 0.438                                            | 0.2     | 108          |

| $h$ (g/m <sup>3</sup> ) | $\theta_1$ (m <sup>3</sup> /m <sup>3</sup> ) | $\Delta\theta$ (m <sup>3</sup> /m <sup>3</sup> ) | $\theta_2$ (m <sup>3</sup> /m <sup>3</sup> ) | $\sigma_N$ (-) | $N_1$ (cph) | $\hat{N}$ (cph) | $\hat{\theta}$ (m <sup>3</sup> /m <sup>3</sup> ) | $R$ (m) | $R_{86}$ (m) |
|-------------------------|----------------------------------------------|--------------------------------------------------|----------------------------------------------|----------------|-------------|-----------------|--------------------------------------------------|---------|--------------|
| 15                      | 0.450                                        | 0.025                                            | 0.425                                        | 0.03           | 610         | 615             | 0.438                                            | 0.2     | 108          |
| 15                      | 0.450                                        | 0.050                                            | 0.400                                        | 0.01           | 610         | 616             | 0.436                                            | 4.5     | 108          |
| 15                      | 0.450                                        | 0.050                                            | 0.400                                        | 0.02           | 610         | 621             | 0.425                                            | 0.2     | 108          |
| 15                      | 0.450                                        | 0.050                                            | 0.400                                        | 0.03           | 610         | 621             | 0.425                                            | 0.2     | 108          |
| 15                      | 0.450                                        | 0.100                                            | 0.350                                        | 0.01           | 610         | 616             | 0.436                                            | 34.4    | 108          |
| 15                      | 0.450                                        | 0.100                                            | 0.350                                        | 0.02           | 610         | 622             | 0.423                                            | 6.3     | 109          |
| 15                      | 0.450                                        | 0.100                                            | 0.350                                        | 0.03           | 610         | 627             | 0.410                                            | 1.2     | 109          |
| 15                      | 0.450                                        | 0.150                                            | 0.300                                        | 0.01           | 610         | 616             | 0.436                                            | 59.4    | 108          |
| 15                      | 0.450                                        | 0.150                                            | 0.300                                        | 0.02           | 610         | 622             | 0.423                                            | 25.1    | 109          |
| 15                      | 0.450                                        | 0.150                                            | 0.300                                        | 0.03           | 610         | 628             | 0.410                                            | 8.8     | 109          |
| 15                      | 0.450                                        | 0.200                                            | 0.250                                        | 0.01           | 610         | 616             | 0.436                                            | 82.3    | 108          |
| 15                      | 0.450                                        | 0.200                                            | 0.250                                        | 0.02           | 610         | 622             | 0.423                                            | 42.6    | 109          |
| 15                      | 0.450                                        | 0.200                                            | 0.250                                        | 0.03           | 610         | 628             | 0.410                                            | 24.0    | 109          |
| 15                      | 0.500                                        | 0.025                                            | 0.475                                        | 0.01           | 589         | 594             | 0.488                                            | 0.2     | 106          |
| 15                      | 0.500                                        | 0.025                                            | 0.475                                        | 0.02           | 589         | 594             | 0.488                                            | 0.2     | 106          |
| 15                      | 0.500                                        | 0.025                                            | 0.475                                        | 0.03           | 589         | 594             | 0.488                                            | 0.2     | 106          |
| 15                      | 0.500                                        | 0.050                                            | 0.450                                        | 0.01           | 589         | 595             | 0.485                                            | 3.0     | 106          |
| 15                      | 0.500                                        | 0.050                                            | 0.450                                        | 0.02           | 589         | 599             | 0.475                                            | 0.2     | 106          |
| 15                      | 0.500                                        | 0.050                                            | 0.450                                        | 0.03           | 589         | 599             | 0.475                                            | 0.2     | 106          |
| 15                      | 0.500                                        | 0.100                                            | 0.400                                        | 0.01           | 589         | 595             | 0.485                                            | 29.5    | 106          |
| 15                      | 0.500                                        | 0.100                                            | 0.400                                        | 0.02           | 589         | 601             | 0.470                                            | 3.9     | 107          |
| 15                      | 0.500                                        | 0.100                                            | 0.400                                        | 0.03           | 589         | 606             | 0.457                                            | 0.8     | 107          |
| 15                      | 0.500                                        | 0.150                                            | 0.350                                        | 0.01           | 589         | 595             | 0.485                                            | 52.8    | 106          |
| 15                      | 0.500                                        | 0.150                                            | 0.350                                        | 0.02           | 589         | 601             | 0.470                                            | 20.1    | 107          |
| 15                      | 0.500                                        | 0.150                                            | 0.350                                        | 0.03           | 589         | 607             | 0.456                                            | 5.3     | 107          |
| 15                      | 0.500                                        | 0.200                                            | 0.300                                        | 0.01           | 589         | 595             | 0.485                                            | 74.0    | 106          |
| 15                      | 0.500                                        | 0.200                                            | 0.300                                        | 0.02           | 589         | 601             | 0.470                                            | 36.4    | 107          |
| 15                      | 0.500                                        | 0.200                                            | 0.300                                        | 0.03           | 589         | 607             | 0.456                                            | 18.5    | 107          |
